# Supplementary material for: A new approach for additive-free room temperature sintering of conductive patterns using polymer-stabilized Sn nanoparticles
Source: Royal Society of Chemistry journal article supplement (doi:10.1039/c6tc00161k), 2016-01-01
Supplement: c6tc00161k1.pdf [file c6tc00161k1.pdf]

## Supporting Information

For

### A New Approach for Additive-free Room Temperature Sintering of Conductive Patterns Using PVP-stabilized Sn Nanoparticles

Hiroaki Shirai, Mai Thanh Nguyen, Yohei Ishida, and Tetsu Yonezawa\*

Division of Materials Science and Engineering, Faculty of Engineering, Hokkaido University, Kita 13, Nishi 8, Kita-ku, Sapporo, Hokkaido, 060-8628, Japan., \*E-mail: [tetsu@eng.hokudai.ac.jp](mailto:tetsu@eng.hokudai.ac.jp); Fax: 011-706-7881

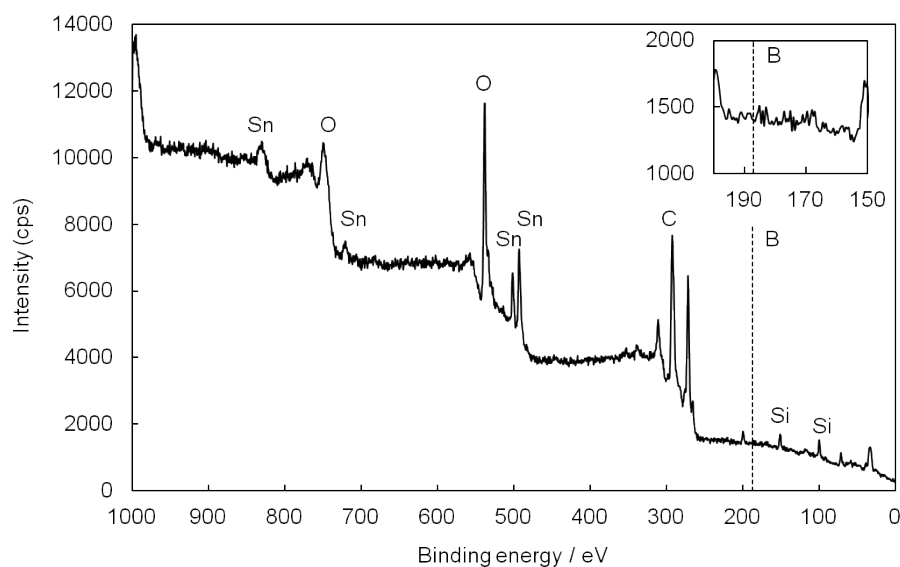

Figure S1. Wide scan XPS spectrum of Sn NPs synthesized using 0.0018 g PVP. The dashed indicated the position of B is used for visual guide. The inset shows expansion spectrum from 150 to 200 eV in the binding energy.

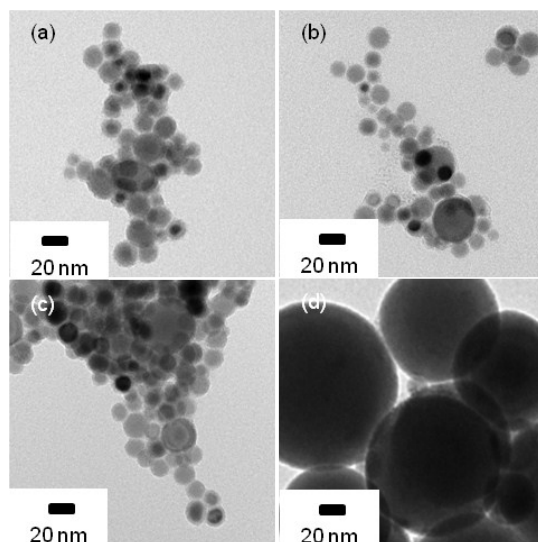

**Figure S2.** TEM images of Sn NPs synthesized using various amounts of PVP: (a) 2.6710 g, (b) 0.8903 g, (c) 0.1781 g, and (d) 0.0018 g.

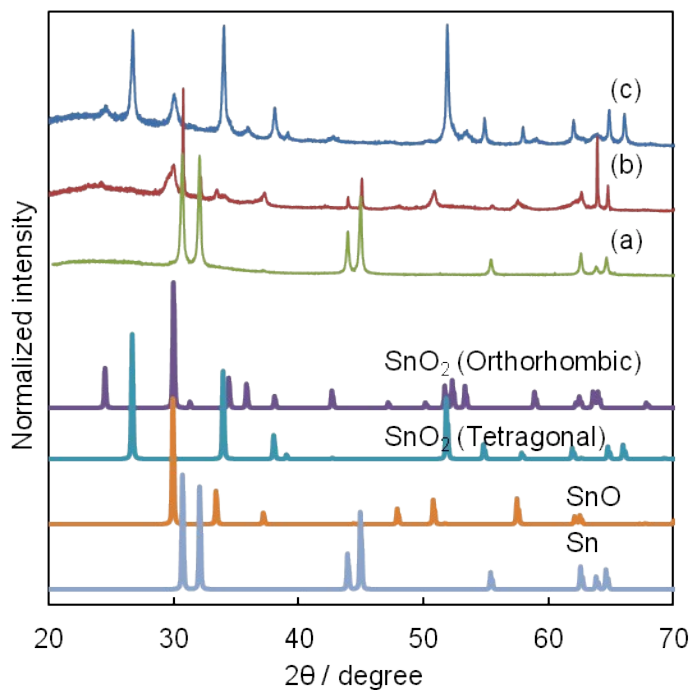

**Figure S3.** (a) XRD pattern of the as-synthesized Sn NPs using 0.1781 g PVP and of samples after heating to (b) 400 °C and (c) 800 °C. The reference patterns of orthorhombic SnO<sub>2</sub> (JCPDS no. 29-1484), tetragonal SnO<sub>2</sub> (JCPDS no. 41-1445), SnO (JCPDS no. 85-0423), and Sn (JCPDS no. 04-0673) are shown.

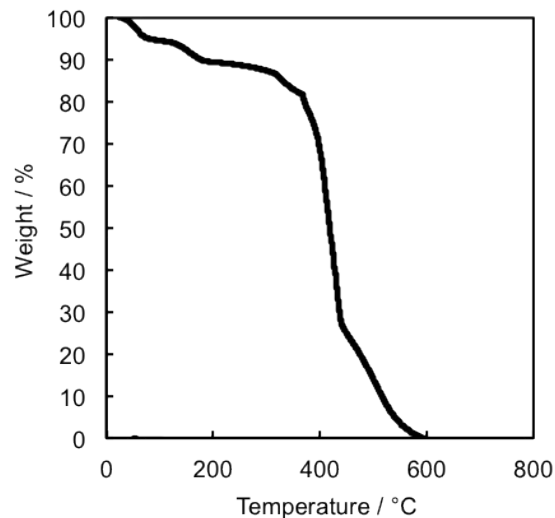

**Figure S4.** TGA curve of PVP under air. TGA measurement (Shimadzu DTG-60H) was operated using air at a flow rate of  $100 \text{ cm}^3 \text{ min}^{-1}$  and at a heating rate of  $5 \text{ }^\circ\text{C min}^{-1}$  from room temperature to  $800 \text{ }^\circ\text{C}$ .

The amount of PVP on the surface (wt%) =  $100 - \text{actual weight increment (wt\%)} \times 100 / 127$   
(eq. S1)

With  $127 \% = \text{MW}(\text{SnO}_2) / \text{MW}(\text{Sn}) \times 100 (\%)$ , where MW is the abbreviation of the molecular weight.

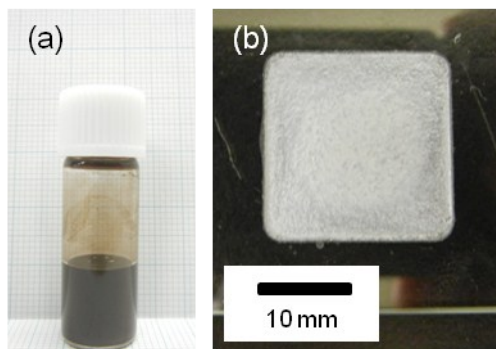

**Figure S5.** A photograph of (a) Sn conductive ink and (b) the conductive pattern formed after placing Sn NPs onto a glass substrate. Sn NPs were synthesized using 5.3420 g PVP.

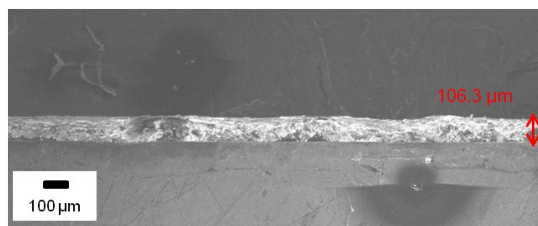

**Figure S6.** Cross-sectional SEM image of a conductive pattern formed using Sn NPs synthesized using 0.0089 g PVP. The thickness of the pattern was 106.3 μm.

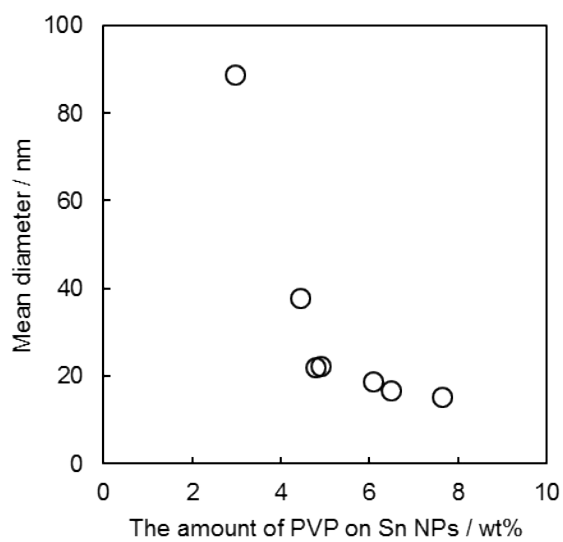

**Figure S7.** Relation between the amount of PVP on the surface of Sn NPs and the average diameter of Sn NPs.

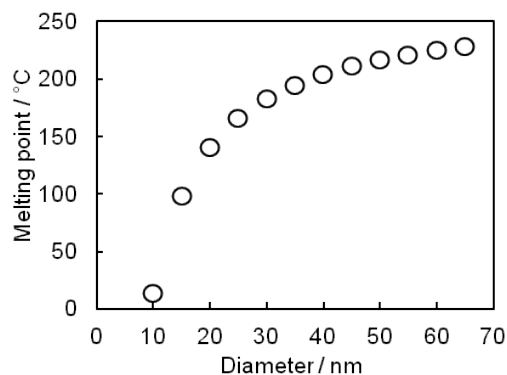

**Figure S8.** The melting temperature of Sn NPs of different sizes estimated using Gibbs-Thomson equation (eq. S2).

$$\Delta T = 4\sigma MT_{bulk} / \Delta H_m r \rho \quad (\text{eq.S2})$$

where  $r$  is the radius of Sn NPs, the values of the surface energy,  $\sigma = 0.56 \text{ J m}^{-2}$ ,<sup>1</sup> the molecular weight,  $M = 118.7 \text{ g mol}^{-1}$ , the bulk melting temperature,  $T_{bulk} = 505.1 \text{ K}$ , the bulk melting enthalpy,  $\Delta H_m = 7.18 \text{ kJ mol}^{-1}$ ,<sup>2</sup> and the material density,  $\rho = 7.365 \times 10^3 \text{ kg m}^{-3}$  are listed for Sn.

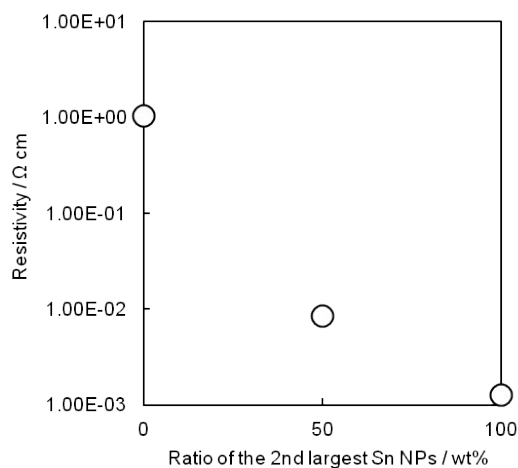

**Figure S9.** Resistivity of Sn patterns prepared from the smallest Sn NPs ( $15.2 \pm 3.1 \text{ nm}$ ), the second largest Sn NPs ( $37.8 \pm 12.5 \text{ nm}$ ) obtained in this study, and their 50 wt% mixture.

Table S1. The ratio of number of Sn NPs with diameter less than 24 nm.

| Sample | Size (TEM) / nm | Number of Sn NPs < 24 nm / % |
|--------|-----------------|------------------------------|
| (a)    | $15.5 \pm 3.1$  | 100                          |
| (b)    | $16.8 \pm 3.3$  | 98                           |
| (c)    | $18.7 \pm 3.8$  | 95                           |
| (d)    | $22.0 \pm 5.0$  | 76                           |
| (e)    | $22.3 \pm 5.1$  | 80                           |
| (f)    | $38.6 \pm 13.2$ | 15                           |
| (g)    | $86.7 \pm 21.6$ | 0                            |

References:

- 1 Z.F. Yuan, K. Mukai, K. Takagi, M. Ohtaka, W. L. Huang and Q. S. Liu, *J. Colloid. Interf. Sci.*, 2002, **254**, 338.
- 2 F. Grønvd, *J. Chem. Thermodynamics*, 1993, **25**, 1133.
